# Central Asia's Hidden Burden of Neglected Tropical Diseases

Peter J. Hotez<sup>1\*</sup>, Ken Alibek<sup>2</sup>

**1** Sabin Vaccine Institute and the National School of Tropical Medicine at Baylor College of Medicine, and Texas Children's Hospital, Houston, Texas, United States of America, **2** Nazarbayev University, Astana, Kazakhstan

The neglected tropical diseases (NTDs) are the most common infections of the world's poorest people living in developing countries [1–7]. They are mostly comprised of chronic parasitic and related infections, with the most common NTDs represented by the soil-transmitted helminthiases, schistosomiasis, lymphatic filariasis, onchocerciasis, and trachoma [1]. Among their common features, the NTDs result in prolonged periods of disability and actually help to promote poverty through their long-standing effects on child development and worker productivity [2]. It is not commonly appreciated that the NTDs are widespread throughout Central Asia where they are also a major determinant of poverty [8]. The five mostly landlocked Central Asian countries—Kazakhstan, Kyrgyzstan, Tajikistan, Turkmenistan, and Uzbekistan (Figure 1)—were established upon the breakup of the former Soviet Union in 1991. They are also linked in history as a vital crossroads (“the Silk Road”) between Asia and Europe and by a common geography comprised of a desert and piedmont region [9]. The five nations have a combined population of 60 million people, with three of them—Kyrgyzstan, Tajikistan, and Uzbekistan—exhibiting a Human Development Index (HDI) that is ranked below 100, which is more or less equivalent to nations such as Guatemala, India, Indonesia, and South Africa [10].

During the Soviet era in the 20th century, some gains were made in parasite and NTD control. For instance, in Uzbekistan a number of NTDs were either eradicated or eliminated as a public health problem, including dracunculiasis in 1931, urban cutaneous leishmaniasis in 1950, malaria in 1960, visceral leishmaniasis in 1968, and hookworm infection in 1974 [11]. However, following the 1991 breakup of the Soviet Union, public infrastructures and services deteriorated in many areas of Central Asia, and breakdowns in health care and preventive services ensued [12]. Of particular relevance to zoonotic NTDs and according to Torgerson et al., the Soviet breakup also meant that large

mechanized slaughterhouses were closed, leaving livestock production in the hands of small farms and unsupervised homes, and largely without veterinary inspection [13,14]. Together with increases in pet and security dogs, veterinary public health was compromised, with a resultant re-emergence of several important NTDs, including echinococcosis and possibly toxocariasis [13–15]. As a result, today several NTDs either remain widespread in Central Asia or may have even increased in prevalence over the last two decades. They include the soil-transmitted helminth infections, food-borne and zoonotic parasitic infections, and vector-borne protozoan infections (Table 1).

## Intestinal Helminth Infections

The major soil-transmitted helminth infections in Central Asia include ascariasis and enterobiasis. Overall, these nematode infections are understudied in Central Asia. The most recent complete assessment of intestinal helminth infections was provided recently by Steinmann et al., who conducted a cross-sectional study of 1,262 children among 51 rural primary schools in southwestern Kyrgyzstan [12]. It was found that most of the children had at least one intestinal helminth infection, led by ascariasis (23%), enterobiasis (19%), and hymenolepiasis (4%). Noted among the risk factors for soil-transmitted helminth infections were the absence of sanitation (ascariasis), and poverty and sharing of beds (enterobiasis). In contrast, the availability of tap water and washing of

raw vegetables mitigated the risk of infection [12]. In Uzbekistan, these infections have been responsible for losses in economic productivity [16]. Steinmann et al. make the case that Kyrgyzstan (and possibly elsewhere in Central Asia) would benefit from mass drug administration (MDA), possibly with a single dose of mebendazole, which is highly effective against both ascariasis and enterobiasis [17], in addition to health education programs and increased clean water availability [12].

## Zoonotic Helminth Infections

The major Central Asian zoonotic helminth infections include echinococcosis, opisthorchiasis, and fascioliasis; toxocariasis and trichinellosis are also present.

## Echinococcosis

A rise in the number of cases of cystic echinococcosis caused by *Echinococcus granulosus* has been noted since 1991 [8,18], which Torgerson et al. attribute to the breakdowns in veterinary public health as outlined above [13]. Overall, cystic echinococcosis has increased 4- to 5-fold over the last two decades in four of the Central Asian nations and in parts of Kazakhstan [13–15]. Today, the incidence rates of infection approach 30 cases per 100,000 in some districts, although the disease is believed to be vastly underreported [13,19]. Some areas may be considered hyperendemic—for instance, in a study in rural eastern Kazakhstan, approximately 1% of the population exhibited evidence of cystic

**Citation:** Hotez PJ, Alibek K (2011) Central Asia's Hidden Burden of Neglected Tropical Diseases. *PLoS Negl Trop Dis* 5(9): e1224. doi:10.1371/journal.pntd.0001224

**Published:** September 27, 2011

**Copyright:** © 2011 Hotez, Alibek. This is an open-access article distributed under the terms of the Creative Commons Attribution License, which permits unrestricted use, distribution, and reproduction in any medium, provided the original author and source are credited.

**Funding:** The authors received no funding for this work.

**Competing Interests:** The authors have declared that no competing interests exist.

\* E-mail: hotez@bcm.edu

Peter J. Hotez, MD, PhD, is Co-Editor-in-Chief of *PLoS Neglected Tropical Diseases*. He is Texas Children's Hospital Endowed Chair of Tropical Pediatrics, President, Sabin Vaccine Institute, Texas Children's Hospital, Baylor College of Medicine, Center for Vaccine Development, and Dean, National School of Tropical Medicine, Baylor College of Medicine.

Commonwealth of Independent States - Central Asian States

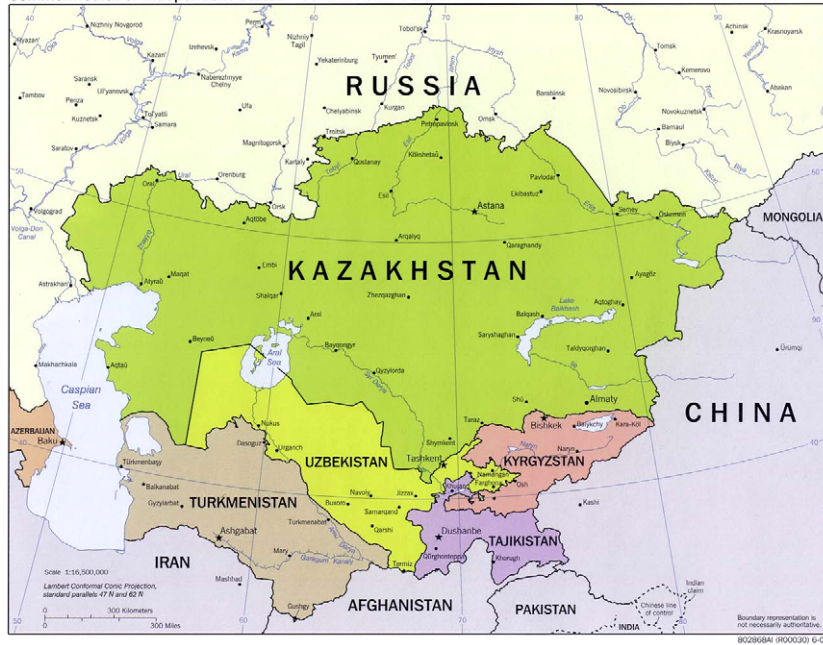

**Figure 1. Commonwealth of Independent States - Central Asian States.** Courtesy of the University of Texas Libraries, The University of Texas at Austin. Map available at: [http://www.lib.utexas.edu/maps/commonwealth/central\\_asian\\_common\\_2002.jpg](http://www.lib.utexas.edu/maps/commonwealth/central_asian_common_2002.jpg). doi:10.1371/journal.pntd.0001224.g001

echinococcosis by ultrasound [15]. Another concerning trend is the disproportionate rise in pediatric cases [13]. Such observations are complemented by veterinary epidemiologic studies in dogs showing that 20% or more of dogs harbor adult *E. granulosus* tapeworms [20], with a high prevalence in both Kyrgyzstan and Kazakhstan [20,21]. Russia has also experienced an increase in imported cases from Central Asia [22]. Alveolar echinococcosis is also prevalent both among dogs, rodents, and in definitive host red foxes [20,23–25].

### Fluke Infections: Opisthorchiasis and Fascioliasis

Globally, there are an estimated 1.2 million cases of opisthorchiasis caused by the liver fluke *Opisthorchis felinus*, which occur primarily in Western Siberia (the Ob and Irtysh River valleys), Ukraine, Belarus, and Kazakhstan [26–28]. In Kazakhstan, opisthorchiasis is endemic in Aktyubinsk, Dzhezkazgan, Karaganda, Pavlodar, Tselinograd, and Turgay districts [26]. The infection is transmitted by the ingestion of uncooked and sometimes salted fish known as *stroganina* [26], and *O. felinus* has been associated with co-infection with *Helicobacter pylori* [29]. *O. felinus* infection results in fever and hepatitis, leading to abdominal pain. Advanced cases also result in suppurative cholangitis, liver fibrosis, and ultimately

cholangiocarcinoma. An estimated 400 cases of cholangiocarcinoma occur annually from chronic *O. felinus* infection [30]. Fascioliasis and dicrocoeliasis are also found in Central Asia, with an overall approximate prevalence of close to 2% among school-aged children in Kyrgyzstan [12].

### Toxocariasis and Trichinellosis

Toxocariasis is prevalent in rural Kazakhstan, especially among children [15], and the infection may be common elsewhere in Central Asia. After *Trichinella spiralis*, *Trichinella britovi* is the second most common *Trichinella* species affecting humans and an important species in Central Asia [31]. *T. britovi* has a sylvatic life cycle with boars, horses, foxes, and jackals as animal reservoir hosts, although it can also infect domestic pigs [31]. *Trichinella pseudospiralis* is also prevalent [31]. There are no disease burden estimates for these species.

Pozio recently made recommendations to the European Union for the control of food-borne helminth infections [32], but they also apply to Central Asia. These recommendations include improvement of farming conditions with health education of livestock producers and farmers, increased efforts and improved methods to detect parasites in slaughtered animals, reductions in contact between livestock

and wild animals, and control of sewage sludge on pastures [32].

### Vector-Borne Protozoan Infections

The two major protozoan infections in Central Asia are leishmaniasis and vivax malaria.

#### Leishmaniasis

The two major forms of leishmaniasis are zoonotic cutaneous leishmaniasis (ZCL) and visceral leishmaniasis (VL). In Central Asia, ZCL is caused predominantly by *Leishmania major*, first described in 1914 by the Russian physicians Yakimov and Schokhor as *L. tropica major* from a patient in Uzbekistan [33]. Additional molecular typing has differentiated human *L. major* species (*L. major sensu stricto*) from the closely related animal species *Leishmania turanica* and *Leishmania gerbilli* [33]. Human ZCL occurs when humans enter sylvatic habitats in river valleys that interrupt the deserts and piedmont plains of Central Asia where both the great gerbil, *Rhombomys optimus* [34], and the *Phlebotomus papatasi* sandfly vector [33,35] are found. In Uzbekistan, a highly aggressive form of ZCL from *L. major* has also been reported [36]. There are no prevalence estimates available for *L. major* ZCL in Central Asia. *Leishmania infantum* is the major cause of VL in Uzbekistan and Tajikistan. This strain of *L. infantum* is believed to be separate from a strain found in Europe, the Middle East, and North Africa [37].

#### Malaria

There is no endemic malaria in Kazakhstan, and in 2010 Turkmenistan became the first Central Asian country to become certified as free of endemic malaria following control efforts that date back to the 1920s [38]. Since the 1950s, only *Plasmodium vivax* has been present, with the last autochthonous case registered in 2004 [38]. Uzbekistan also reported zero cases for the first time in 2009 [39]. In contrast, Tajikistan and Kyrgyzstan still report endemic malaria [39]. In Tajikistan, 30% of the population was at risk for malaria in 2009 [39]; however, the number of cases is down considerably from a peak of 30,000 reported cases in 1997 [40] as a result of programs of indoor residual spraying and MDA of primaquine and other anti-malaria drugs in the years following a five-year civil conflict from 1992 to 1997 [40–42]. Almost all of the cases are a result of *P. vivax* infections that

**Table 1.** Selected Neglected Tropical Diseases in Central Asia.

| Disease                                                                  | Prevalence                                    | Country Where Measured                                                   | Reference |
|--------------------------------------------------------------------------|-----------------------------------------------|--------------------------------------------------------------------------|-----------|
| <b>Intestinal helminth infections</b>                                    |                                               |                                                                          |           |
| Ascariasis                                                               | 23%                                           | Kyrgyz Republic (Osh oblast)                                             | [12]      |
| Enterobiasis                                                             | 19%                                           | Kyrgyz Republic (Osh oblast)                                             | [12]      |
| Hymenolepiasis                                                           | 4%                                            | Kyrgyz Republic (Osh oblast)                                             | [12]      |
| <b>Zoonotic helminth infections</b>                                      |                                               |                                                                          |           |
| Cystic echinococcosis                                                    | Up to 30 cases per 100,000 (1% of population) | Kazakhstan, Krgyz Republic, Tajikistan, Turkmenistan, [13,15] Uzbekistan |           |
| Opisthorchiasis                                                          | 1.2 million cases                             | Kazakhstan, Belarus, Ukraine, Western Siberia                            | [27]      |
| Fascioliasis                                                             | 2%                                            | Kyrgyz Republic (Osh oblast)                                             | [12]      |
| Toxocariasis                                                             | 11%                                           | Kazakhstan (rural Eastern)                                               | [15]      |
| <b>Vector-borne protozoan infections</b>                                 |                                               |                                                                          |           |
| Leishmaniasis (cutaneous <i>L. major</i> ; visceral <i>L. infantum</i> ) | Not determined                                |                                                                          | [35–37]   |
| Malaria                                                                  | Number of probable and confirmed:             | Number of suspected cases:                                               | [39]      |
|                                                                          | Kyrgyzstan 4                                  | Kyrgyzstan 33,983                                                        |           |
|                                                                          | Tajikistan 165                                | Tajikistan 165,266                                                       |           |
|                                                                          | Turkmenistan 0                                | Turkmenistan 94,237                                                      |           |
|                                                                          | Uzbekistan 4                                  | Uzbekistan 916,839                                                       |           |
| <b>Other protozoan infections</b>                                        |                                               |                                                                          |           |
| Toxoplasmosis                                                            | 16% seroprevalence                            | Kazakhstan (rural eastern)                                               | [15]      |

doi:10.1371/journal.pntd.0001224.t001

peak in August and September, and are transmitted primarily by *Anopheles superpictus* and *Anopheles pulcherrimus* in areas of cotton and rice field irrigation [40]. Children are disproportionately affected [43,44], and the highest morbidity occurs in the southern Khation region that borders on Afghanistan [43]. The *P. vivax* epidemic there is very much fueled by human migrations from Afghanistan and a permissive climate [41]. In turn, human migrations from Tajikistan thwart efforts to eliminate malaria in Uzbekistan [45]. *P. vivax* is also the predominant malaria parasite in Kyrgyzstan [46]. Ultimately, control and elimination efforts for *P. vivax* malaria infections in Central Asia will depend upon ongoing indoor residual spraying with insecticides and MDA with primaquine (except for patients with glucose 6 phosphate dehydrogenase deficiency [40–42]). Such large-scale efforts are being supported by the Global Fund to Fight AIDS, Tuberculosis and Malaria [43]. Success in eliminating malaria will also depend on international cooperation with Afghanistan [47].

Among the other vector-borne neglected infections that exist in Central Asia are plague, tularemia, tick-borne relapsing

fever, Crimean hemorrhagic fever, tick typhus, and Q fever [48].

### Other NTDs

Toxoplasmosis was noted to be prevalent in rural Kazakhstan [15], but the overall prevalence in the region is unknown. Brucellosis is an important bacterial NTD [49]. Similarly, intestinal protozoan infections such as amoebiasis and cryptosporidiosis are common and represent opportunistic infections among patients with HIV/AIDS [50]. Canine rabies is still present in the region [51].

### Concluding Remarks

With some exceptions, such as the detailed knowledge on malaria in the region [38,39] and cystic echinococcosis [13,15], there is an absence of baseline information on the prevalence and disease burden of Central Asia's NTDs in the English scientific literature. The dearth of information may reflect a general absence of surveillance efforts in the two decades following the breakup of the Soviet Union, in parallel with breakdowns in human and veterinary public health infrastructure in these countries, although our observation may also reflect the fact that

much of this information may be contained in the Russian scientific literature, which we did not tap. Among the priorities are stepped-up surveillance activities for the major intestinal helminth infections, including ascariasis and enterobiasis, the major food-borne and zoonotic helminth infections, and leishmaniasis and other vector-borne NTDs. Also of importance would be efforts to learn more about non-vector-borne protozoan infections such as toxoplasmosis and intestinal infections, brucellosis, and rabies. Some of these activities would be greatly aided by increased international cooperation between the Central Asian republics and with Afghanistan, which could also launch efforts for MDA of affected populations with soil-transmitted helminth infections and malaria, and livestock and vector control for the zoonotic NTDs, and possibly the establishment of a new international research center for NTDs. The Global Fund to Fight AIDS, Tuberculosis, and Malaria might also consider how to best integrate NTDs into their control and elimination programs. The burden of NTDs appears to be high among the poorest people living in Central Asia, and there is an urgent need to tackle this problem using multi-dimensional approaches.

## References

- Hotez PJ, Molyneux DH, Fenwick A, Kumaresan J, Sachs SE, et al. (2007) Control of neglected tropical diseases. *N Engl J Med* 357(10): 1018–1027. doi:10.1056/NEJMra064142.
- Hotez PJ, Fenwick A, Savioli L, Molyneux DH (2009) Rescuing the bottom billion through control of neglected tropical diseases. *Lancet* 373(9674): 1570–1575. doi:10.1016/S0140-6736(09)60233-6.
- Hotez PJ, Bottazzi ME, Franco-Paredes C, Ault SK, Periago MR (2008) The neglected tropical diseases of Latin America and the Caribbean: a review of disease burden and distribution and a roadmap for control and elimination. *PLoS Negl Trop Dis* 2(9): e300. doi:10.1371/journal.pntd.0000300.
- Hotez PJ (2008) Neglected infections of poverty in the United States of America. *PLoS Negl Trop Dis* 2(6): e256. doi:10.1371/journal.pntd.0000256.
- Hotez PJ (2010) Neglected infections of poverty among the indigenous peoples of the Arctic. *PLoS Negl Trop Dis* 4(1): e606. doi:10.1371/journal.pntd.0000606.
- Hotez PJ, Kamath A (2009) Neglected tropical diseases in sub-Saharan Africa: review of their prevalence, distribution, and disease burden. *PLoS Negl Trop Dis* 3(8): e412. doi:10.1371/journal.pntd.0000412.
- Hotez PJ, Ehrenberg JP (2010) Escalating the global fight against neglected tropical diseases through interventions in the Asia Pacific region. *Adv Parasitol* 72: 31–53.
- Torgerson PR, Karaeva RR, Corkeri N, Abdyjaparov TA, Kuttubaev OT, et al. (2003) Human cystic echinococcosis in Kyrgyzstan: an epidemiological study. *Acta Trop* 85(1): 51–61.
- Asian Development Bank (2010) Central Asia atlas of natural resources. Manila: Asian Development Bank.
- UNDP (2010) Human development report 2010 - 20th anniversary edition. Available: <http://hdr.undp.org/en/reports/global/hdr2010/>. Accessed 22 August 2011.
- Abdiev FT, Shamgunova GS (2001) [Control of parasitic diseases in Uzbekistan]. *Med Parazitol (Mosk)* Jul-Sep(3): 60–61.
- Steinmann P, Usubalieva Z, Imanalieva C, Minbaeva G, Stefiuk K, et al. (2010) Rapid appraisal of human intestinal helminth infections among schoolchildren in Osh oblast, Kyrgyzstan. *Acta Trop* 116(3): 178–184.
- Torgerson PR, Oguljahan B, Muminov AE, Karaeva RR, Kuttubaev OT, et al. (2006) Present situation of cystic echinococcosis in central Asia. *Parasitol Int* 55 Suppl: S207–S212.
- Carabin H, Budke CM, Cowan LD, Willingham AL, 3rd, Torgerson PR (2005) Methods for assessing the burden of parasitic zoonoses: echinococcosis and cysticercosis. *Trends Parasitol* 21(7): 327–333.
- Torgerson PR, Rosenheim K, Tanner I, Ziadinov I, Grimm F, et al. (2009) Echinococcosis, toxocarosis and toxoplasmosis screening in a rural community in eastern Kazakhstan. *Trop Med Int Health* 14(3): 341–348.
- Abdiev TA, Zubitskaia MA, Kovalenko AF, Fuzailov I, Baratov RD, et al. (1990) [An evaluation of the economic loss from intestinal helminthiasis in the Uzbek SSR]. *Med Parazitol (Mosk)* Apr-Jun(2): 37–39.
- Keiser J, Utzinger J (2008) Efficacy of current drugs against soil-transmitted helminth infections: systematic review and meta-analysis. *JAMA* 299(16): 1937–1948.
- Usubalieva Z, Toigombaeva VC, Nogoibaeva KA, Mergenov AE (2009) [Parasitic diseases in the Kyrgyz Republic: epidemiological aspects]. *Med Parazitol (Mosk)* Apr-Jun(2): 27–30.
- Nazirov FG, Ilkhamov IL, Amebekov NC (2002) [Echinococcosis in Uzbekistan: types of problems and methods to improve treatment]. *Medical Journal Uzbekistan*;2/3: 2–5.
- Ziadinov I, Mathis A, Trachsel D, Rysmukhambetova A, Abdyjaparov TA, et al. (2008) Canine echinococcosis in Kyrgyzstan: using prevalence data adjusted for measurement error to develop transmission dynamics models. *Int J Parasitol* 38(10): 1179–1190.
- Torgerson PR, Shaikenov BS, Baitursinov KK, Abdybekova AM (2002) The emerging epidemic of echinococcosis in Kazakhstan. *Trans R Soc Trop Med Hyg* 96(2): 124–128.
- Syskova TG (2004) Parasitic diseases in the Russian federation under the conditions of population migration]. *Med Parazitol (Mosk)*(1): 3–6.
- Ziadinov I, Deplazes P, Mathis A, Mutunova B, Abdykerimov K, et al. (2010) Frequency distribution of echinococcus multilocularis and other helminths of foxes in Kyrgyzstan. *Vet Parasitol* 171(3–4): 286–292.
- Shaikenov BS (2006) Distribution and ecology of echinococcus multilocularis in Central Asia. *Parasitol Int* 55 Suppl: S213–S219.
- Torgerson PR, Keller K, Magnotta M, Ragland N (2010) The global burden of alveolar echinococcosis. *PLoS Negl Trop Dis* 4(6): e722. doi:10.1371/journal.pntd.0000722.
- Yossepowitch O, Gotesman T, Assous M, Marva E, Zimlichman R, et al. (2004) Opisthorchiasis from imported raw fish. *Emerg Infect Dis* 10(12): 2122–2126.
- Keiser J, Utzinger J (2009) Food-borne trematodiasis. *Clin Microbiol Rev* 22(3): 466–483.
- Tappe D, Trifienbach R (2010) Histopathological diagnosis of opisthorchiasis in an immigrant. *Am J Trop Med Hyg* 83(4): 734–735.
- Beloborodova EI, Naumova TI, Kritskaia NG, Zagromova TA, Gladilina EK, et al. (2006) [The course of helicobacter pylori-associated duodenal ulcer concurrent with chronic opisthorchiasis]. *Med Parazitol (Mosk)* Oct-Dec(4): 49–51.
- Parkin DM (2006) The global health burden of infection-associated cancers in the year 2002. *Int J Cancer* 118(12): 3030–3044.
- Gottstein B, Pozio E, Nockler K (2009) Epidemiology, diagnosis, treatment, and control of trichinellosis. *Clin Microbiol Rev* 22(1): 127–45, Table of Contents.
- Pozio E (2008) Epidemiology and control prospects of foodborne parasitic zoonoses in the European Union. *Parassitologia* 50(1–2): 17–24.
- Strelkova MV (1996) Progress in studies on central Asian foci of zoonotic cutaneous leishmaniasis: a review. *Folia Parasitol (Praha)* 43(1): 1–6.
- Elfari M, Schnur LF, Strelkova MV, Eisenberger CL, Jacobson RL, et al. (2005) Genetic and biological diversity among populations of *Leishmania major* from Central Asia, the Middle East and Africa. *Microbes Infect* 7(1): 93–103. doi:10.1016/j.micinf.2004.09.010.
- Bern C, Maguire JH, Alvar J (2008) Complexities of assessing the disease burden attributable to leishmaniasis. *PLoS Negl Trop Dis* 2(10): e313. doi:10.1371/journal.pntd.0000313.
- Faulde MK, Werner A, Heyl G (2007) Untreated zoonotic cutaneous leishmaniasis characterizing a highly aggressive strain type of *Leishmania major* in Uzbekistan. *J Eur Acad Dermatol Venereol* 21(10): 1432–1433.
- Alam RM, Kovalenko DA, Kuhls K, Nasyrova MZ, Ponomareva VI, et al. (2009) Identification of the agent causing visceral leishmaniasis in Uzbeki and Tajiki foci by analysing parasite DNA extracted from patients' Giemsa-stained tissue preparations. *Parasitology* 136(9): 981–986.
- WHO (19 October 2010) Turkmenistan certified malaria-free. Available: <http://www.who.int/malaria/elimination/turkmenistancertifiedmalariafree/en/index.html>. Accessed 22 August 2011.
- WHO Global Malaria Programme (2010) World malaria report 2010. Available: [http://www.who.int/malaria/world\\_malaria\\_report\\_2010/en/index.html](http://www.who.int/malaria/world_malaria_report_2010/en/index.html). Accessed 22 August 2011.
- Matthys B, Sherkanov T, Karimov SS, Khabirov Z, Mostowlansky T, et al. (2008) History of malaria control in Tajikistan and rapid malaria appraisal in an agro-ecological setting. *Malar J* 7: 217.
- Rebholz CE, Michel AJ, Maselli DA, Saipphudin K, Wyss K (2006) Frequency of malaria and glucose-6-phosphate dehydrogenase deficiency in Tajikistan. *Malar J* 5: 51.
- Karimov SS, Kadamov DS, Murodova NK (2008) The current malaria situation in Tadjikistan. *Med Parazitol (Mosk)* Jan-Mar(1): 33–36.
- Rafiev K, Aliev SP, Karimov SS, Khodzhaeva NM, Bazarova LM (2009) [The epidemiological and clinical characteristics of malaria under the present conditions of Tajikistan]. *Med Parazitol (Mosk)* Oct-Dec(4): 50–54.
- Ziaeva DM, Sherkhonov TA (2009) [Clinical features of tropical malaria in children in Tadjikistan]. *Med Parazitol (Mosk)* Jan-Mar(1): 26–29.
- Khusainova NG, Shamgunova GS, Razakov S, Shoumarov SB (2010) [Monitoring of the malaria situation and the assessment of antimalaria measures in the Republic of Uzbekistan]. *Med Parazitol (Mosk)* Jan-Mar(1): 33–35.
- Usenbaev NT, Ezhov MN, Zvantsov AB, Annarbaev A, Zhoroev AA, et al. (2006) [An outbreak of Plasmodium vivax malaria in Kyrgyzstan]. *Med Parazitol (Mosk)* Jan-Mar(1): 17–20.
- Karimov SS, Sherkhonov TA, Saiburkhonov DS (2009) [Malaria in Tadjikistan: from control to elimination]. *Med Parazitol (Mosk)* Jan-Mar(1): 23–26.
- Rapoport LP (1999) [Landscape and geographical distribution of natural reservoirs of human vector-borne diseases in Southern Kazakhstan and Kirghizia]. *Med Parazitol (Mosk)* Oct-Dec(4): 26–29.
- Pappas G, Papadimitriou P, Akritidis N, Christou I, Tsianos EV (2006) The new global map of human brucellosis. *Lancet Infect Dis* 6(2): 91–99.
- Nurtaev K, Badalova NS, Zaliyeva MV, Osipova SO (2005) Intestinal parasitic diseases in HIV-infected patients in Uzbekistan]. *Med Parazitol (Mosk)* Jul-Sep(3): 45–49.
- Gruzdev KN (2008) The rabies situation in Central Asia. *Dev Biol (Basel)* 131: 37–42.
